# Supplementary figures and images for: A mycorrhiza-associated receptor-like kinase with an ancient origin in the green lineage
Source: PubMed Central journal article supplement — Proc Natl Acad Sci U S A. 2021 Jun 14;118(25):e2105281118. doi: 10.1073/pnas.2105281118 (PMC8237591; doi:10.1073/pnas.2105281118), 2021-06-14

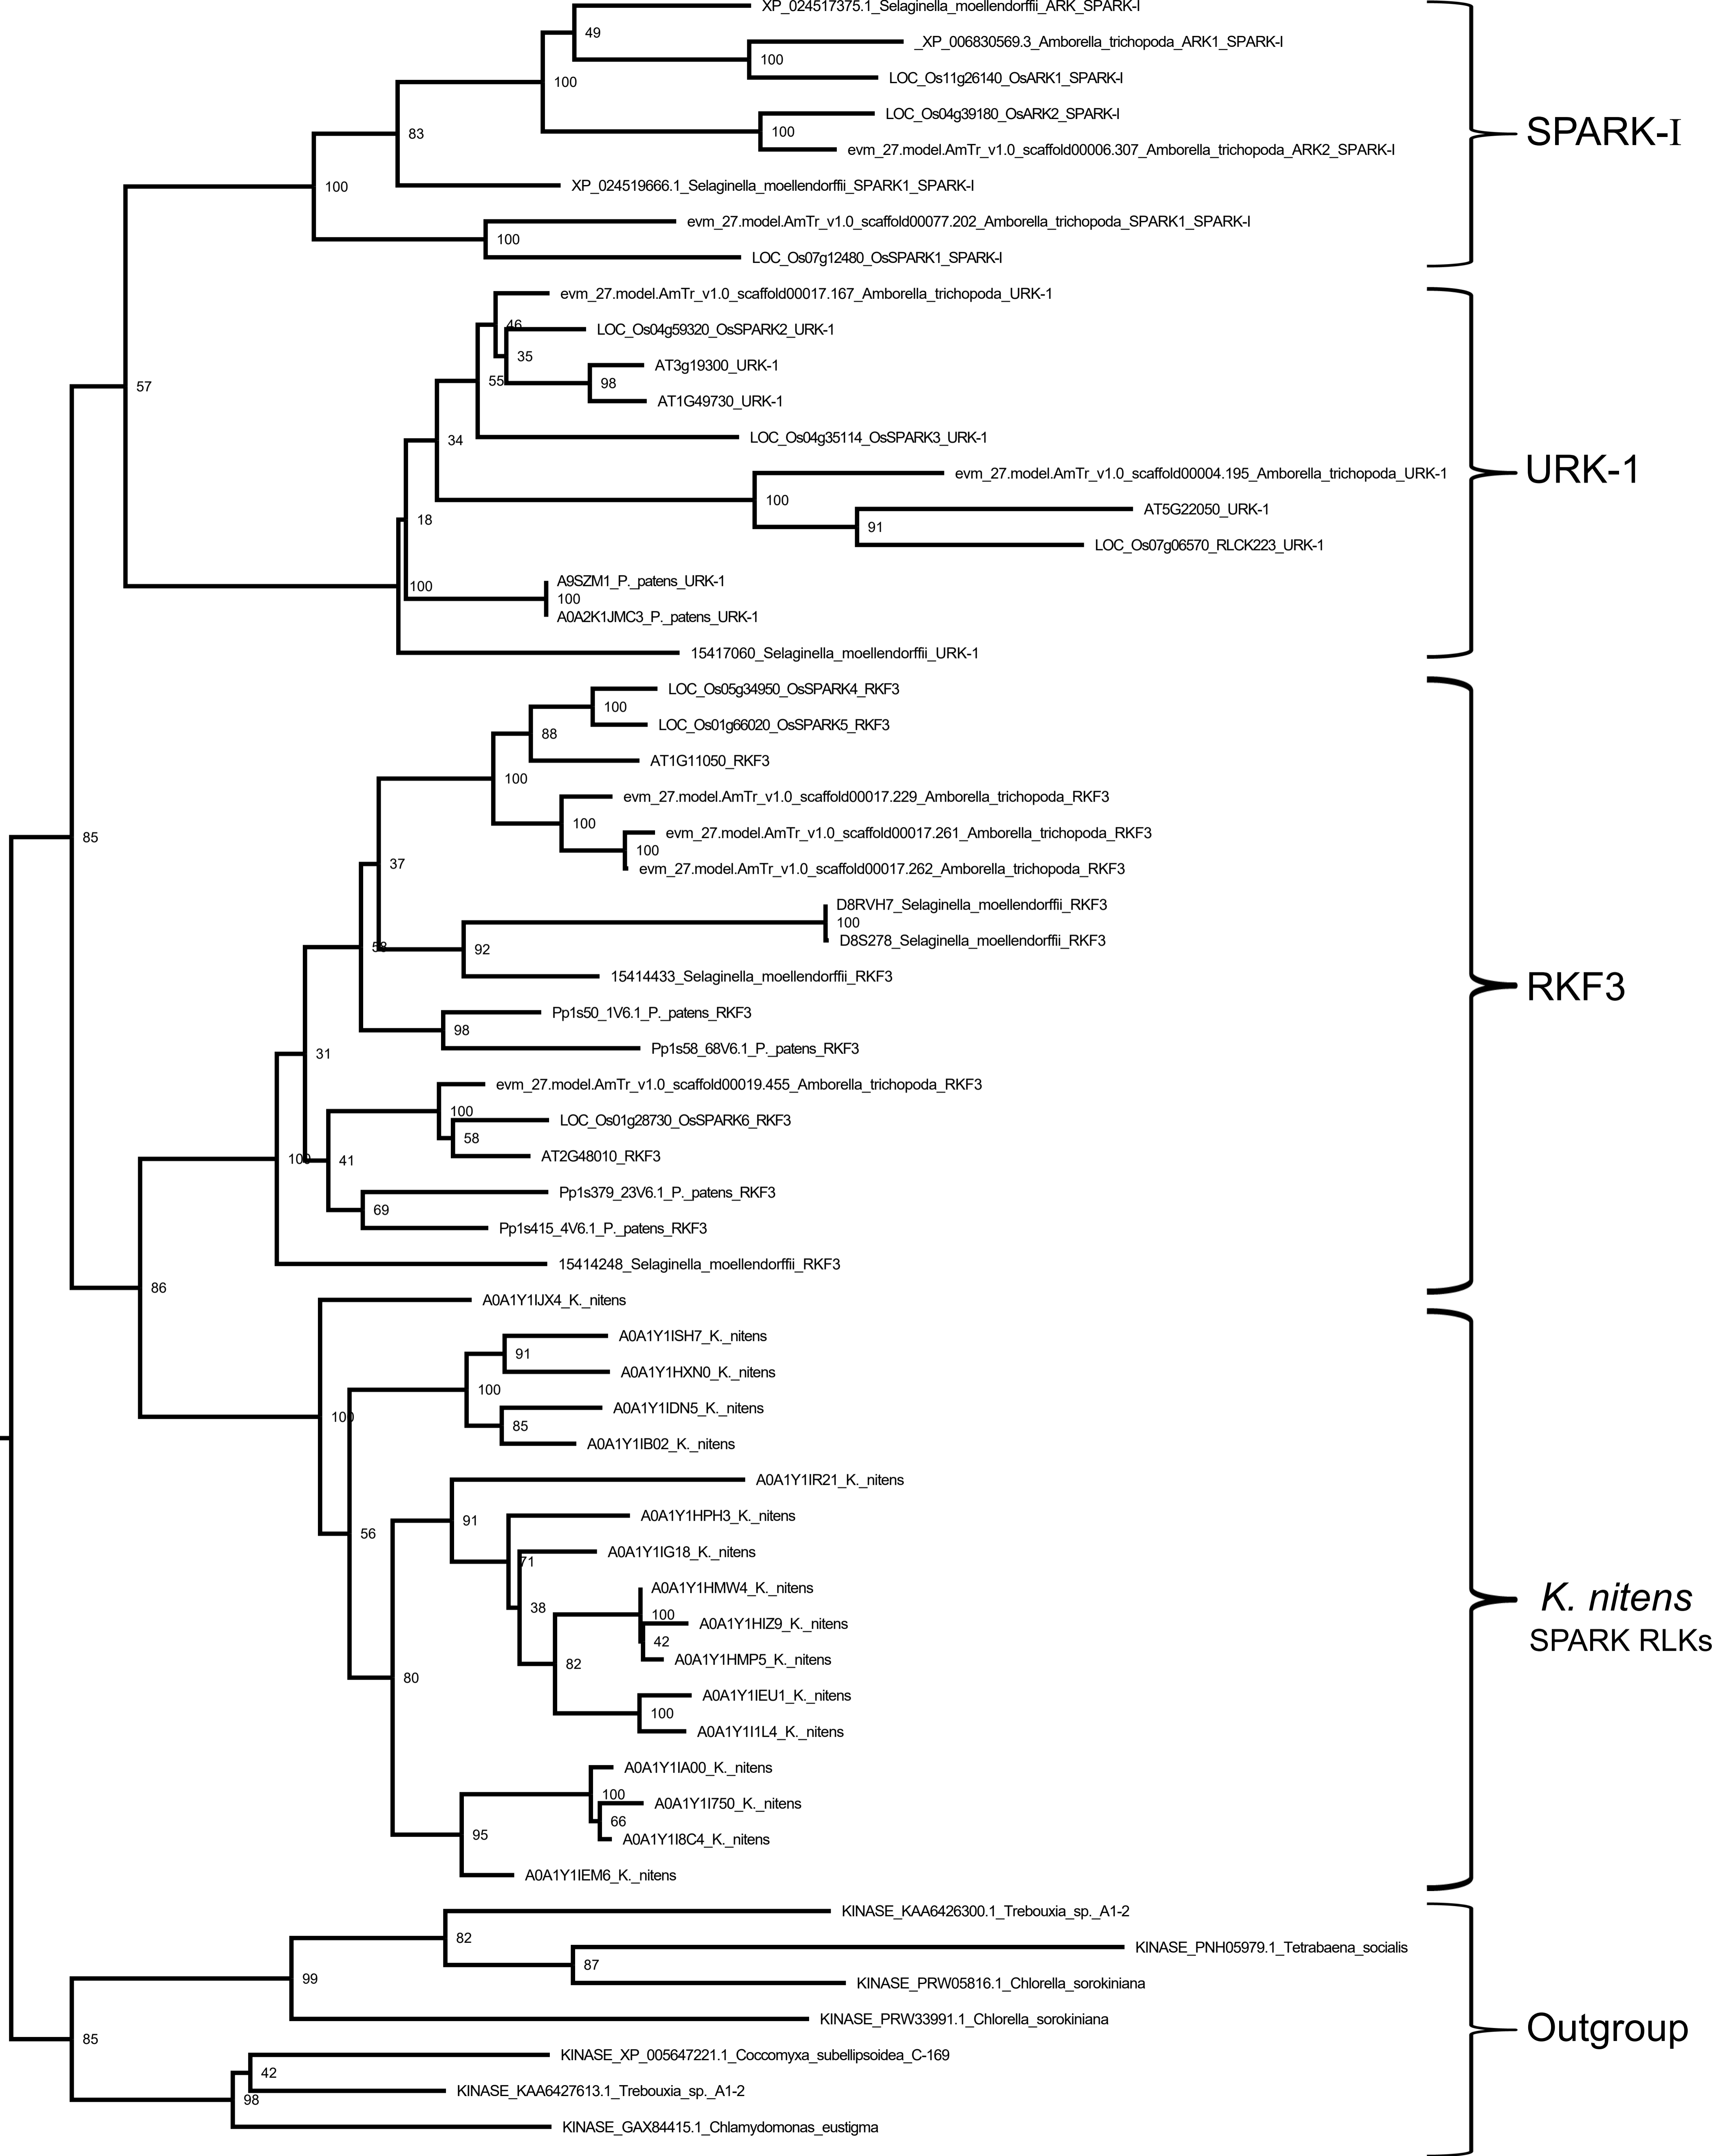

Supplement: pnas.2105281118.sd04.pdf [file pnas.2105281118.sd04.pdf]
